# Supplementary material
Source: HighWire-hosted journal article supplement (https://cmaj.ca/content/suppl/2019/11/01/cmaj.151421)
Supplement: 151421-guide-fr.pdf [file 151421-guide-fr.pdf]

# Recommandations sur le dépistage du cancer du poumon

Groupe d'étude canadien sur les soins de santé préventifs\*

■ Citation : *CMAJ* 2016. DOI: 10.1503/cmaj.151421

Baladodiffusions *CMAJ* : Entrevue (en anglais) avec l'auteure à <https://soundcloud.com/cmajpodcasts/151421-guide>

\*Les auteurs de cet article sont mentionnés à la fin, dans la section « Équipe de rédaction de la ligne directrice ». La liste complète des membres actuels du Groupe d'étude canadien sur les soins de santé préventifs se trouve à l'adresse <https://canadiantaskforce.ca/a-propos-du-geccsp/membres/?lang=fr>

**L**e cancer du poumon est la cause la plus fréquente de décès par cancer et le cancer le plus souvent diagnostiqué chez les Canadiens; on estime qu'en 2015<sup>1</sup>, 26 600 Canadiens ont reçu un diagnostic de cancer du poumon, et que 20 900 en sont morts. Au Canada, l'incidence du cancer du poumon est plus élevée chez les hommes que chez les femmes (bien que cet écart commence à s'amenuiser) et plus de 85 % des cas sont liés au tabagisme. Environ 44 % des Canadiens (12,6 millions) sont fumeurs ou l'ont été<sup>2</sup>. Les personnes ayant de lourds antécédents de tabagisme présentent le risque le plus élevé de cancer du poumon. Les antécédents de tabagisme se mesurent généralement en paquets-années, correspondant au produit du nombre moyen de paquets de cigarettes fumés chaque jour et du nombre d'années de tabagisme (p. ex. une personne ayant fumé 1 paquet [20 cigarettes] par jour pendant 30 ans et une autre ayant fumé 2 paquets par jour pendant 15 ans cumuleraient toutes deux 30 paquets-année).

Le taux de mortalité est extrêmement élevé chez les patients atteints du cancer du poumon de stade avancé, mais beaucoup plus faible aux stades précoces (en 2007, la survie relative à 5 ans pour les stades 4 et 1A était de 1 % et de 49 %, respectivement<sup>3</sup>). Le dépistage du cancer du poumon vise à déceler la maladie au stade précoce, lorsqu'elle est plus susceptible de répondre au traitement et qu'elle risque moins d'entraîner de graves symptômes ou la mort. Par conséquent, un tel dépistage a été proposé comme complément aux autres méthodes visant à alléger le fardeau associé au cancer du poumon, comme les initiatives mondiales de lutte contre le tabagisme et les interventions conçues pour encourager l'abandon du tabagisme<sup>4</sup>. Aucun programme structuré de dépistage du cancer du poumon n'a été mis en œuvre au Canada.

## Portée

La présente ligne directrice vise à guider les fournisseurs de soins primaires et les responsables des politiques concernant le dépistage du cancer du poumon; elle remplace les recommanda-

## POINTS CLÉS

- Les adultes de 55 à 74 ans présentant un risque élevé de cancer du poumon (c.-à-d. les personnes qui fument ou qui ont cessé de fumer depuis moins de 15 ans et qui ont des antécédents de tabagisme d'au moins 30 paquets-années) pourraient bénéficier d'un dépistage du cancer du poumon par tomographie à densité corporelle (TDM) à faible dose, effectué annuellement pendant 3 années consécutives (recommandation faible).
- Cette recommandation faible implique que les cliniciens devraient discuter avec leurs patients des bénéfices et des préjudices du dépistage du cancer du poumon par TDM à faible dose, notamment des faux positifs, des effets indésirables des tests complémentaires effractifs et du surdiagnostic.
- En raison du risque de préjudices liés au dépistage, la TDM à faible dose et la prise en charge ultérieure doivent être effectuées dans des milieux de soins possédant une expertise dans le diagnostic précoce et le traitement du cancer du poumon.
- Pour prévenir 1 décès par cancer du poumon, il faudrait soumettre 322 personnes au dépistage pendant 6,5 ans.
- Comme le tabagisme est associé à 85 % des cancers du poumon au Canada, la lutte contre le tabagisme et l'abandon du tabagisme sont essentiels à la réduction de la morbidité et de la mortalité liées au cancer du poumon.
- Il n'y a pas de bénéfice évident lié au dépistage du cancer du poumon par TDM à faible dose chez les adultes de moins de 55 et de plus de 74 ans, ou chez ceux qui présentent un risque faible d'après leurs antécédents de tabagisme (c.-à-d. les personnes ayant des antécédents de tabagisme de moins de 30 paquets-années ou qui ont cessé de fumer depuis plus de 15 ans).
- Il n'y a aucun bénéfice associé au dépistage du cancer du poumon par radiographie pulmonaire (avec ou sans cytologie des expectorations), mais la technique présente des préjudices connus, comme des faux positifs, des effets indésirables des tests complémentaires effractifs et du surdiagnostic.

tions du Groupe d'étude canadien sur les soins de santé préventifs formulées en 2003<sup>5</sup>. Depuis la publication de ces recommandations, de nouvelles études ont été publiées, notamment un essai clinique randomisé de grande envergure comparant la

tomodensitométrie (TDM) à faible dose (qui émet moins de rayonnements ionisants que la TDM ordinaire) à la radiographie pulmonaire<sup>6</sup>. Des essais en cours sur la TDM à faible dose<sup>7-10</sup> devraient fournir davantage de données sur l'efficacité de cette méthode pour le dépistage du cancer du poumon. Les présentes recommandations pourraient être mises à jour après la publication des résultats, ou à tout le moins d'ici les 5 prochaines années.

## Méthodologie

Le Groupe d'étude canadien est un comité indépendant de cliniciens et de méthodologistes qui formule des recommandations concernant les interventions cliniques de prévention primaire et secondaire (<https://canadiantaskforce.ca/?lang=fr>). Les présentes recommandations ont été préparées par un groupe de travail composé de 6 membres du Groupe d'étude canadien et de personnel scientifique de l'Agence de la santé publique du Canada<sup>11</sup>.

### Encadré 1 : Classification des recommandations

Les recommandations sont classées selon l'approche GRADE (*Grading of Recommendations Assessment, Development and Evaluation*),<sup>13</sup> qui prévoit 2 catégories de recommandations: fortes et faibles. La catégorie d'une recommandation dépend de la qualité des données probantes, du degré d'incertitude dans le rapport entre les effets désirables et les effets indésirables, du degré d'incertitude et de la variabilité dans les valeurs et préférences des patients, et du degré d'incertitude quant à l'utilisation judicieuse des ressources.

Les recommandations fortes sont celles pour lesquelles le Groupe d'étude canadien sur les soins de santé préventifs considère que les effets désirables de l'intervention surpassent les effets indésirables (recommandation forte en faveur de l'intervention) ou que les effets indésirables surpassent les effets désirables (recommandation forte à l'encontre de l'intervention). Une recommandation forte implique que la plupart des individus bénéficieront au mieux de l'action proposée.

Les recommandations faibles sont celles pour lesquelles les effets désirables de l'intervention surpassent probablement les effets indésirables (recommandation faible en faveur de l'intervention) ou les effets indésirables surpassent probablement les effets désirables (recommandation faible à l'encontre de l'intervention), mais pour lesquelles une incertitude marquée existe. Si une recommandation concernant une mesure préventive est jugée faible, on peut supposer que la plupart des gens souhaiteraient bénéficier de cette mesure, mais que beaucoup ne le souhaiteraient pas. Les cliniciens doivent reconnaître que le choix approprié peut être différent d'une personne à l'autre et doivent aider chaque patient à prendre une décision de gestion du risque conforme à ses valeurs et préférences. L'adoption de politiques nécessitera des débats substantiels et la participation de diverses parties prenantes. Les recommandations faibles résultent d'un équilibre précaire entre les effets désirables et les effets indésirables de l'intervention, d'une faible qualité des données probantes ou d'une grande variabilité dans les valeurs et préférences des patients.

La qualité des données probantes est considérée comme élevée, moyenne, faible ou très faible, selon la probabilité que des recherches ultérieures modifient le degré de confiance à l'endroit de l'effet estimé de l'intervention (voir l'annexe 2 à l'adresse [www.cmaj.ca/lookup/suppl/doi:10.1503/cmaj.151421/-/DC1](http://www.cmaj.ca/lookup/suppl/doi:10.1503/cmaj.151421/-/DC1)).

Pour orienter la rédaction, le Centre d'analyse et de synthèse des données probantes de l'Université McMaster (Hamilton, Ontario) a réalisé une revue systématique avec l'aide d'un expert clinique indépendant et du personnel scientifique de l'Agence de la santé publique du Canada<sup>12</sup>. L'exercice visait à évaluer les effets positifs et négatifs du dépistage du cancer du poumon sur la mortalité toutes causes confondues, la mortalité liée au cancer du poumon, le stade du cancer au moment du diagnostic, les taux d'abandon du tabagisme et de faux positifs, les effets indésirables des tests complémentaires effractifs ainsi que sur le surdiagnostic<sup>12</sup>. Un résumé du cadre d'analyse définissant les questions clés et contextuelles est fourni à l'annexe 1 (accessible à l'adresse [www.cmaj.ca/lookup/suppl/doi:10.1503/cmaj.151421/-/DC1](http://www.cmaj.ca/lookup/suppl/doi:10.1503/cmaj.151421/-/DC1)). Le Centre d'analyse et de synthèse des données probantes et le Groupe d'étude canadien ont utilisé l'approche GRADE (*Grading of Recommendations Assessment, Development and Evaluation*) pour évaluer la qualité des données probantes et la force de la recommandation (encadré 1)<sup>13</sup>.

La recherche documentaire a pris pour point de départ la revue systématique Cochrane de 2013 sur le dépistage du cancer du poumon<sup>14</sup>, qui avait recensé les articles publiés jusqu'en mai 2012 dans CENTRAL, MEDLINE, PREMEDLINE et Embase. Une mise à jour a été effectuée dans ces mêmes bases de données, avec les mêmes mots clés, pour la période de mai 2012 au 31 mars 2015. Les études citées par la revue systématique Cochrane qui respectaient les critères d'évaluation du Centre d'analyse et de synthèse des données probantes ont été retenues; les données en ont été extraites et présentées dans les tableaux décisionnels GRADE. En ce qui concerne les préjudices du dépistage, une nouvelle recherche sur les essais cliniques randomisés (ECR) et les études d'observation a été effectuée dans MEDLINE, Embase et CENTRAL pour la période de l'an 2000 au 31 mars 2015 afin de s'assurer que tous les documents traitant des effets néfastes graves soient recensés. L'intégralité de la revue systématique se trouve à l'adresse <https://canadiantaskforce.ca/?lang=fr>.

Une mise à jour de la recherche en prépublication a été effectuée dans MEDLINE, Embase et CENTRAL pour la période du 31 mars 2015 au 20 janvier 2016, limitée aux ECR traitant des issues cliniques jugées critiques.

Les recommandations ont été révisées et approuvées par l'ensemble du Groupe d'étude canadien et ont fait l'objet d'un examen externe par des experts universitaires et cliniciens.

Le Groupe d'étude canadien accompagne ses lignes directrices d'outils d'application des connaissances destinés à divers groupes d'utilisateurs finaux (p. ex., cliniciens et patients). Ces outils font l'objet de tests d'utilisabilité rigoureux tenant compte des commentaires des cliniciens (outils pour les patients et les cliniciens) et des patients (outils pour les patients), recueillis grâce à des entrevues, des groupes de discussion et des sondages.

Des renseignements supplémentaires sur la méthodologie utilisée par le Groupe d'étude canadien sont accessibles à divers endroits<sup>11</sup>, notamment sur son site Web (<https://canadiantaskforce.ca/methodologie/?lang=fr>).

## Recommandations

*Nous recommandons d'effectuer un dépistage annuel du cancer du poumon par tomodensitométrie (TDM) à faible dose pendant un maximum de 3 années consécutives chez les adultes de 55 à 74 ans ayant des antécédents de tabagisme d'au moins 30 paquets-années, qui fument ou qui ont cessé de fumer il y a moins de 15 ans. Le dépistage doit être effectué uniquement dans des milieux de soins possédant une expertise dans le diagnostic précoce et le traitement du cancer du poumon (recommandation faible, données probantes de faible qualité).*

*Nous recommandons de ne pas effectuer de dépistage du cancer du poumon par TDM à faible dose chez tous les autres adultes, quels que soient leurs antécédents de tabagisme, leur âge ou les autres facteurs de risque (forte recommandation, données probantes de très faible qualité).*

*Nous recommandons de ne pas effectuer de dépistage du cancer du poumon par radiographie pulmonaire, avec ou sans cytologie des expectorations (forte recommandation, données probantes de faible qualité).*

Les recommandations sont synthétisées dans l'encadré 2 et un résumé clinique est fourni à l'annexe 2 (accessible à l'adresse [www.cmaj.ca/lookup/suppl/doi:10.1503/cmaj.151421/-/DC1](http://www.cmaj.ca/lookup/suppl/doi:10.1503/cmaj.151421/-/DC1)). Le Groupe d'étude canadien a fondé ces recommandations sur une évaluation globale de l'équilibre entre les bénéfices et les préjudices potentiels liés au dépistage du cancer du poumon, soulevant les bienfaits potentiels d'une détection précoce de la maladie et les préjudices associés au surdiagnostic et aux tests complémentaires effractifs.

Ces recommandations s'appliquent aux adultes de 18 ans et plus chez qui on ne soupçonne aucun cancer du poumon; elles ne s'appliquent pas aux personnes qui ont déjà eu un cancer du poumon ou qui présentent des signes ou des symptômes de la maladie.

### Encadré 2 : Synthèse des recommandations pour les cliniciens et les décideurs

Les recommandations qui suivent s'appliquent aux adultes de 18 ans et plus chez qui on ne soupçonne aucun cancer du poumon; elles ne s'appliquent pas aux personnes qui ont déjà eu un cancer du poumon ou qui présentent des signes ou des symptômes de la maladie.

*Nous recommandons d'effectuer un dépistage annuel du cancer du poumon par tomodensitométrie (TDM) à faible dose pendant un maximum de 3 années consécutives chez les adultes de 55 à 74 ans ayant des antécédents de tabagisme d'au moins 30 paquets-années, qui fument ou qui ont cessé de fumer depuis moins de 15 ans. Le dépistage doit être effectué uniquement dans des milieux de soins possédant une expertise dans le diagnostic précoce et le traitement du cancer du poumon (recommandation faible, données probantes de faible qualité).*

*Nous recommandons de ne pas effectuer de dépistage du cancer du poumon par TDM à faible dose chez tous les autres adultes, quels que soient leurs antécédents de tabagisme, leur âge ou les autres facteurs de risque (recommandation forte, données probantes de très faible qualité).*

*Nous recommandons de ne pas effectuer de dépistage du cancer du poumon par radiographie pulmonaire, avec ou sans cytologie des expectorations (recommandation forte, données probantes de faible qualité).*

## Bénéfices du dépistage

Parmi les 33 études sur le dépistage du cancer du poumon retenues dans la revue systématique, 13 étaient des essais cliniques randomisés (ECR) évaluant les bénéfices du dépistage<sup>12</sup>. Sept études de faible qualité comparaient le dépistage par radiographie pulmonaire (avec ou sans cytologie des expectorations) à l'absence de dépistage ou à un dépistage moins intensif (p. ex., dépistage par radiographie pulmonaire plus espacé ou sur recommandation) et ont montré que les bénéfices en matière de détection précoce de la maladie étaient faibles. Comparativement aux soins usuels, le dépistage par radiographie pulmonaire a permis de détecter plus de cancers de stade précoce et moins de cancers de stade avancé. Toutefois, un tel dépistage n'a pas réduit la mortalité liée au cancer du poumon (risque relatif [RR] 0,99, intervalle de confiance [IC] à 95 % 0,92–1,07) ou la mortalité toutes causes confondues (RR 0,98, IC à 95 % 0,96–1,00)<sup>12</sup>.

Trois essais de faible qualité comparant le dépistage annuel par TDM à faible dose à l'absence de dépistage ou aux soins usuels n'ont permis de constater aucune différence dans la mortalité liée au cancer du poumon (RR 1,30, IC à 95 % 0,81–2,11) ou la mortalité toutes causes confondues (RR 1,38, IC à 95 % 0,86–2,22) après 5 ans ou moins de suivi<sup>12</sup>. Une récente mise à jour de la recherche documentaire<sup>15</sup> a permis de trouver une étude randomisée allemande présentant des résultats préliminaires de détection précoce du cancer du poumon par TDM multicoupe (comparativement à l'absence de dépistage) après 5 ans de suivi. L'ajout de ces données à l'analyse de la mortalité toutes causes confondues n'a pas significativement influencé les résultats (RR 1,20, IC à 95 % 0,83–1,73).

Deux études comparant la TDM à faible dose et la radiographie pulmonaire ont été incluses dans l'analyse des données probantes; même si le dépistage par radiographie pulmonaire ne fait pas partie des soins standard au Canada, des études antérieures ont démontré qu'il n'existe aucune différence entre cette méthode de dépistage et les soins usuels en ce qui a trait à la mortalité. Une de ces études, (le *National Lung Screening Trial*)<sup>6</sup> comportait des résultats concernant la mortalité. Cet ECR de qualité élevée a noté une réduction de 15 % de la mortalité liée au cancer du poumon (RR 0,85, IC à 95 % 0,75–0,96) et de 6 % de la mortalité toutes causes confondues (RR 0,94, IC à 95 % 0,88–1,00) associées au dépistage du cancer du poumon par TDM à faible dose, comparativement au dépistage par radiographie pulmonaire, après 6,5 ans de suivi<sup>16</sup>. Concrètement, cela signifie que si 1000 personnes subissent un dépistage annuel par TDM à faible dose 3 années de suite, on pourrait prévenir 3 décès par cancer du poumon de plus qu'avec le dépistage par radiographie pulmonaire (nombre de patients à dépister : 322). Le dépistage par TDM à faible dose réduit de 0,31 % le risque absolu de mortalité liée au cancer du poumon, et de 0,46 % la mortalité toutes causes confondues<sup>12</sup>. Cette méthode permet également de déceler plus de cancers de stade précoce (8 de plus sur 1000 personnes soumises au dépistage) et moins de cancers de stade avancé (4 de moins sur 1000 personnes soumises au dépistage) que la radiographie pulmonaire; les 2 résultats sont significatifs. Les résultats de la deuxième étude<sup>17</sup>, qui comparait la TDM à faible dose et la radiographie pulmonaire, n'ont pas été agrégés

à ceux du *National Lung Screening Trial* en raison d'une période de suivi incompatible ( $\leq 12$  mois), du petit nombre d'événements signalés (cancer du poumon) et de l'absence de résultats de mortalité rapportés<sup>12</sup>.

Quatre études ne montraient aucune différence significative entre les groupes soumis au dépistage (TDM à faible dose ou radiographie pulmonaire) et les groupes témoins en ce qui concerne le taux d'abandon du tabagisme<sup>12</sup>. Puisque ces données sont auto-déclarées, il est toutefois difficile d'estimer le risque de biais.

### Préjudices liés au dépistage

En tout, 31 études, dont plusieurs à devis observationnel, ont évalué les préjudices liés au dépistage et aux tests complémentaires effractifs<sup>12</sup>. Parmi les principaux préjudices figuraient les faux positifs, les complications majeures ou les décès dus aux tests complémentaires effractifs et le surdiagnostic.

Les données du *National Lung Screening Trial* suggèrent que sur 1000 personnes soumises à un dépistage annuel par TDM 3 ans de suite, 391 obtiennent au moins 1 résultat positif : de ce total, 40 ont réellement le cancer du poumon et 351 sont des faux positifs<sup>6,12</sup>. Par conséquent, on doit effectuer des tests complémentaires, y compris des interventions effractives mineures (p. ex., bronchoscopie, biopsie par aspiration) et majeures (p. ex., thoracotomie, thoracoscopie), pour déterminer si un résultat positif indique ou non la présence d'un cancer du poumon. Ces interventions posent un risque, bien que faible, de complications majeures ou de décès. D'après les données du *National Lung Screening Trial*, 3 personnes soumises à une TDM à faible dose sur 1000 développeront des complications majeures à la suite d'un test effractif et moins de 1 personne sur 1000 décèdera au cours des 60 jours suivant le test<sup>6,12</sup>. Ces complications peuvent aussi survenir chez des personnes ayant obtenu un faux positif : des données tirées de 17 études montrent que 5 personnes soumises à une TDM à faible dose sur 1000 subissent une intervention effractive majeure inutile pour une affection qui s'avère finalement bénigne (comparativement à 3 sur 1000 pour ce qui est de la radiographie pulmonaire)<sup>12</sup>.

Le surdiagnostic survient lorsque le dépistage chez un patient asymptomatique aboutit à la détection et au diagnostic d'un cancer à croissance lente, qui n'aurait jamais causé de problème de santé à la personne sa vie durant<sup>18</sup>. Bien que les estimations actuelles de surdiagnostic de cancer du poumon varient selon les seuils utilisés et se basent sur des suivis limités, des études observationnelles suggèrent que de 2 à 16% des cancers du poumon détectés par radiographie pulmonaire et 11 à 26% des cancers du poumon détectés par TDM à faible dose représentent des surdiagnostics<sup>12</sup>. Le surdiagnostic entraîne souvent des traitements inutiles (surtraitement), qui peuvent causer des préjudices aux patients.

### Caractéristiques de performance des outils de dépistage

Les caractéristiques de diverses technologies appliquées à la TDM à faible dose (p. ex., multicoupe ou hélicoïdale), mais non à la radiographie pulmonaire, ont été examinées par le Groupe d'étude<sup>12</sup>. La TDM à faible dose a une sensibilité élevée (80%–100%), mais sa spécificité varie fortement (28%–100%), ce qui contribue probablement à la fréquence élevée de faux

positifs. D'après les études, la TDM multicoupe jumelée à l'interprétation et au diagnostic assistés par ordinateur ainsi qu'à l'intervention de 2 radiologues indépendants présente la sensibilité (94,6%) et la spécificité (98,3%) les plus élevées<sup>12</sup>. En comparaison, le *National Lung Screening Trial*, qui a utilisé la TDM hélicoïdale à faible dose sans interprétation ni diagnostic assistés par ordinateur et a eu recours à un seul radiologue, a rapporté une sensibilité de 94,4% et une spécificité de 72,6%<sup>6,12</sup>. Le seuil pour un résultat positif de TDM à faible dose varie selon les études (de  $> 3$  à  $> 10$  mm). Actuellement, il n'existe aucun consensus sur le seuil optimal permettant de réduire la mortalité tout en réduisant les préjudices.

### Justification

Les données du *National Lung Screening Trial*<sup>6</sup> semblent indiquer que le dépistage par TDM à faible dose pourrait réduire la mortalité liée au cancer du poumon chez les patients à risque élevé. Toutefois, ces bénéfices n'ont été mentionnés que dans un seul ECR, et le dépistage ainsi que les tests complémentaires effractifs posent un risque de préjudices. De plus, même s'il n'existe aucune raison de penser que le dépistage par radiographie pulmonaire augmenterait le risque de décès liés au cancer du poumon, le *National Lung Screening Trial* a comparé le dépistage par TDM à faible dose à cette méthode plutôt qu'à l'absence de dépistage (données probantes indirectes). Pour ces raisons, le Groupe d'étude canadien a formulé une recommandation faible d'effectuer un dépistage par TDM à faible dose chez les hommes et les femmes présentant un risque élevé de cancer du poumon (adultes de 55 à 74 ans ayant des antécédents de tabagisme d'au moins 30 paquets-années, qui fument ou ont fumé). Les données appuyant cette recommandation sont de faible qualité. Bien qu'une étude de qualité élevée (le *National Lung Screening Trial*) ait orienté la recommandation<sup>6</sup>, des études additionnelles de faible qualité ont servi à l'évaluation des principales issues cliniques; selon l'approche GRADE, la classification de l'ensemble des données doit se faire d'après la qualité des plus faibles données utilisées. Des recherches en cours pourraient modifier notre niveau de confiance en ce qui concerne les bénéfices du dépistage du cancer du poumon par TDM à faible dose et nous réévaluerons nos recommandations une fois que ces données auront été publiées.

La recommandation de dépister la population à risque élevé accorde une valeur élevée au léger bénéfice de réduction de la mortalité liée au cancer du poumon et au pronostic sombre associé au cancer du poumon non traité<sup>19</sup> et une valeur plus faible au risque d'effets indésirables, de surdiagnostic et au manque de données comparant la TDM à faible dose à l'absence de dépistage.

Aucune étude sur le dépistage par TDM à faible dose portant sur des adultes qui présentent un risque faible ou modéré de cancer du poumon ou des facteurs de risque autres que le tabagisme (p. ex., exposition au radon) n'évaluait les issues cliniques critiques ou importantes définies par le Groupe d'étude canadien. Par conséquent, l'ensemble des données a été considéré de très faible qualité. On s'attend à ce que le bénéfice absolu du dépistage soit moins élevé chez les hommes et les femmes qui ne présentent pas un risque élevé de cancer du poumon (personnes

qui ont des antécédents de tabagisme de moins de 30 paquets-années ou qui ont cessé de fumer depuis plus de 15 ans) que chez les patients à risque élevé étudiés dans le *National Lung Screening Trial*; les préjudices potentiels (p. ex., faux positifs, effets indésirables des tests complémentaires effractifs et surdiagnostic) sont toutefois les mêmes pour tous. Pour ces raisons, nous déconseillons fortement d'effectuer un dépistage chez les adultes qui ne présentent pas un risque élevé de cancer du poumon ou dont les facteurs de risque ne sont pas liés au tabagisme.

Enfin, nous recommandons fortement de ne pas effectuer le dépistage du cancer du poumon par radiographie pulmonaire, une recommandation appuyée par des données probantes de faible qualité. En effet, les données actuelles semblent indiquer que cette méthode n'offrirait aucun bénéfice (n'influe pas sur la mortalité liée au cancer du poumon ou toutes causes confondues), alors que les préjudices potentiels demeureraient les mêmes (p. ex., surdiagnostic, faux positifs et complications associées aux tests complémentaires).

## Facteurs à considérer pour la mise en application des recommandations

Ces recommandations ne s'appliquent qu'aux adultes chez qui aucune donnée clinique ne laisse soupçonner un cancer du poumon. Chez les adultes présentant des symptômes de cancer du poumon (p. ex., hémoptysie, perte de poids, dyspnée), les cliniciens devraient envisager d'effectuer des tests diagnostiques conformément aux indications cliniques, quels que soient les antécédents de tabagisme ou l'âge.

Une recommandation faible suppose que la plupart des adultes concernés souhaiteraient se soumettre à un dépistage du cancer du poumon, mais que beaucoup pourraient raisonnablement préférer l'éviter. Les fournisseurs de soins primaires devraient discuter des bénéfices et des préjudices potentiels avec les patients exposés à un risque élevé selon leurs antécédents de tabagisme et leur âge. Ils devraient également tenir compte de leur état de santé général : pour que le traitement soit bénéfique, les patients doivent avoir une espérance de vie raisonnable et être en mesure de recevoir un traitement (s'il y a lieu). Les personnes qui accordent une plus haute valeur à une possible réduction de la mortalité et se soucient moins des préjudices potentiels (p. ex., taux élevé de faux positifs et complications dues aux tests complémentaires) auront probablement une préférence pour le dépistage, alors que celles qui considèrent la réduction de la mortalité trop faible et qui s'inquiètent des effets indésirables du dépistage pourraient choisir ne pas s'y soumettre.

Comme l'exactitude du test de détection et la qualité des évaluations ultérieures et de la prise en charge sont essentielles pour que les bénéfices surpassent les préjudices, le dépistage du cancer du poumon par TDM à faible dose ne devrait être effectué que dans des établissements offrant des soins intégrés de qualité semblable ou supérieure à ceux mentionnés dans le *National Lung Screening Trial*<sup>6</sup> (p. ex., centres employant des radiologues et des technologues en radiologie qualifiés, ayant des lignes directrices en matière de suivi et de diagnostic qui concordent

avec le protocole de l'étude et possédant une expertise dans le diagnostic précoce et le traitement du cancer du poumon). L'utilisation d'un calculateur de risque de nodules pourrait également réduire le risque de surdiagnostic et le taux de faux positifs. La mise en œuvre des présentes recommandations dans des milieux ne possédant pas l'expérience nécessaire pourrait faire diminuer le rapport bénéfices:préjudices et possiblement accroître le risque de préjudices. Le Groupe d'étude canadien reconnaît que la TDM à faible dose et l'expertise nécessaire ne sont actuellement pas offertes dans certaines régions du Canada (p. ex., régions rurales et éloignées); les responsables des politiques devront en tenir compte.

## Valeurs et préférences des patients

Les préférences des patients concernant le dépistage du cancer du poumon ont été évaluées par 7 études incluses dans la revue systématique<sup>12</sup> ainsi que par une nouvelle recherche documentaire du Groupe d'étude. La revue a permis de conclure que la plupart des participants à risque élevé (adultes de 55 à 74 ans qui fument ou qui ont fumé) étaient particulièrement disposés à se soumettre à un dépistage du cancer du poumon en raison de leurs antécédents de tabagisme, de la conviction que la détection précoce améliore les résultats de santé et d'une histoire familiale de cancer du poumon<sup>12</sup>. Parmi les obstacles potentiels à la participation, mentionnons les désagréments du dépistage et les expériences antérieures négatives avec les professionnels de la santé ou les milieux de soins. Les patients soumis à un dépistage du cancer du poumon par TDM à faible dose n'ont pas ressenti beaucoup de stress ni d'anxiété<sup>12</sup>. Le Groupe d'étude canadien estime que la volonté des patients à risque élevé de se soumettre à l'examen appuie la recommandation d'effectuer un dépistage chez ce groupe.

Le Groupe d'étude canadien a organisé une série de groupes de discussion et mené un sondage auprès de 15 membres du public (âge moyen : 63 ans [étendue : de 36 à 76 ans], 12 femmes et 8 fumeurs ou anciens fumeurs) pour évaluer la perception des recommandations sur le dépistage du cancer du poumon<sup>20</sup>. En général, les participants étaient d'accord pour dire que les recommandations étaient appropriées, bénéfiques et réalisables, même si certains ont soulevé des doutes concernant l'accès à la TDM à faible dose et la restriction de l'admissibilité aux adultes de 55 à 74 ans.

## Autres facteurs à considérer

Il se peut qu'augmenter la durée ou la fréquence du dépistage apporte davantage de bénéfices, mais ce n'est qu'une conjecture, puisqu'il n'existe aucune donnée provenant d'ECR qui pourrait soutenir une telle recommandation. Bien que le dépistage prolongé (plus de 3 examens) puisse réduire la mortalité, les faux positifs qui s'ensuivraient et les complications associées aux tests complémentaires effractifs requis pour confirmer le résultat pourraient perturber le rapport entre les bienfaits et les préjudices décrit dans le *National Lung Screening Trial*<sup>6</sup>.

Comme le tabagisme demeure le principal facteur de risque de cancer du poumon, tous les programmes de dépistage visant la réduction de la morbidité et de la mortalité liées à cette

maladie devraient prévoir des interventions encourageant les gens à cesser de fumer (ce qui fait bien plus que réduire le risque de cancer du poumon). Des ressources d'aide à l'abandon du tabagisme se trouvent sur le Portail canadien des pratiques exemplaires de l'Agence de la santé publique du Canada<sup>21</sup>.

### Mesures de performance suggérées

Le Réseau pancanadien de dépistage du cancer du poumon travaille actuellement à concevoir des indicateurs de qualité nationaux<sup>22</sup>. On a aussi proposé d'évaluer la performance, bien que ce soit difficile, entre autres en calculant le taux de discussion sur le dépistage du cancer du poumon par TDM à faible dose parmi la population à risque élevé et la proportion des adultes potentiellement admissibles au dépistage qui ont reçu de l'information sur ses risques et bénéfices (idéalement à l'aide d'un outil d'aide à la décision fondé sur des données probantes). La réduction du recours à la radiographie pulmonaire pour

dépister le cancer du poumon est une mesure de mise en œuvre de la ligne directrice potentiellement importante. En outre, il faudrait évaluer en continu les risques du dépistage et des tests complémentaires dans différents milieux, et poursuivre le suivi de l'incidence du cancer du poumon et de la mortalité associée à l'échelle provinciale, territoriale et nationale.

### Incidences économiques

Nous avons évalué les coûts et conséquences du dépistage du cancer du poumon au Canada effectué selon la ligne directrice en vigueur à partir du Modèle de gestion des risques de cancer<sup>23</sup>, un modèle de microsimulation basé sur les résultats du *National Lung Screening Trial*, mais qui compare les coûts et conséquences du dépistage par TDM à faible dose à ceux de l'absence de dépistage. Nous avons évalué le modèle selon les procédures du Groupe d'étude canadien, et l'avons jugé approprié dans ce contexte<sup>24</sup>.

**Tableau 1 : Synthèse de recommandations canadiennes et internationales sur le dépistage du cancer du poumon**

| Organisation                                                                  | Recommandation                                                                                                                                                                                                                                                                                                                                                                                                                                                                                                                                                                                                                               |
|-------------------------------------------------------------------------------|----------------------------------------------------------------------------------------------------------------------------------------------------------------------------------------------------------------------------------------------------------------------------------------------------------------------------------------------------------------------------------------------------------------------------------------------------------------------------------------------------------------------------------------------------------------------------------------------------------------------------------------------|
| Groupe d'étude canadien sur les soins de santé préventifs (en vigueur)        | Effectuer un dépistage annuel du cancer du poumon par TDM à faible dose pendant un maximum de 3 années consécutives chez les adultes asymptomatiques de 55 à 74 ans ayant des antécédents de tabagisme d'au moins 30 paquets-années, qui fument ou qui ont cessé de fumer depuis moins de 15 ans.                                                                                                                                                                                                                                                                                                                                            |
| Groupe d'étude canadien sur les soins de santé préventifs (2003) <sup>5</sup> | Ne pas effectuer de dépistage du cancer du poumon par radiographie pulmonaire chez les adultes asymptomatiques; les données actuelles sont insuffisantes pour valider l'utilisation de la TDM à faible dose comme examen de dépistage dans cette population.                                                                                                                                                                                                                                                                                                                                                                                 |
| US Preventive Services Task Force (2013) <sup>4</sup>                         | Effectuer un dépistage annuel du cancer du poumon par TDM à faible dose chez les adultes asymptomatiques de 55 à 80 ans ayant des antécédents de tabagisme d'au moins 30 paquets-années qui fument ou qui ont cessé de fumer au cours des 15 dernières années.                                                                                                                                                                                                                                                                                                                                                                               |
| Action Cancer Ontario (2013) <sup>26</sup>                                    | Effectuer un dépistage du cancer du poumon par TDM à faible dose chez la population à risque élevé (adultes de 55 à 74 ans ayant des antécédents de tabagisme d'au moins 30 paquets-années qui fument ou qui ont cessé de fumer au cours des 15 dernières années et qui ne sont pas malades) chaque année pendant 3 années consécutives, puis tous les 2 ans.                                                                                                                                                                                                                                                                                |
| American Cancer Society (2013) <sup>27</sup>                                  | Effectuer un dépistage annuel du cancer du poumon par TDM à faible dose chez les adultes de 55 à 74 ans ayant des antécédents de tabagisme d'au moins 30 paquets-années qui fument ou qui ont cessé de fumer au cours des 15 dernières années et qui sont en relativement bonne santé.                                                                                                                                                                                                                                                                                                                                                       |
| American College of Chest Physicians (2013) <sup>28</sup>                     | Effectuer un dépistage annuel du cancer du poumon par TDM à faible dose chez les adultes de 55 à 74 ans ayant des antécédents de tabagisme d'au moins 30 paquets-années qui fument ou qui ont cessé de fumer au cours des 15 dernières années.                                                                                                                                                                                                                                                                                                                                                                                               |
| American Lung Association (2012; mise à jour: 2015) <sup>29</sup>             | Effectuer un dépistage annuel du cancer du poumon par TDM à faible dose chez les adultes de 55 à 74 ans ayant des antécédents de tabagisme d'au moins 30 paquets-années qui fument ou ont cessé de fumer au cours des 15 dernières années et qui n'ont pas d'antécédents de cancer du poumon.                                                                                                                                                                                                                                                                                                                                                |
| American Association for Thoracic Surgery (2012) <sup>30</sup>                | Effectuer un dépistage annuel du cancer du poumon par TDM à faible dose chez les adultes de 55 à 79 ans ayant des antécédents de tabagisme d'au moins 30 paquets-années; les adultes de 79 ans et moins qui ont déjà reçu un diagnostic de cancer du poumon, qui n'ont pas connu de récurrence après 4 ans de suivi et qui pourraient tolérer le traitement si le dépistage révélait un deuxième cancer primitif du poumon; et les adultes de 50 à 79 ans ayant des antécédents de tabagisme d'au moins 20 paquets-années et une comorbidité donnant un risque cumulatif de cancer du poumon de 5 % ou plus au cours des 5 années suivantes. |
| National Comprehensive Cancer Network (2015) <sup>31</sup>                    | Effectuer un dépistage annuel du cancer du poumon par TDM à faible dose chez les adultes de 55 à 74 ans ayant des antécédents de tabagisme d'au moins 30 paquets-années qui ont cessé de fumer il y a moins de 15 ans et les adultes de 50 ans et plus ayant des antécédents de tabagisme d'au moins 20 paquets-années et un autre facteur de risque (autre que l'exposition à la fumée secondaire).                                                                                                                                                                                                                                         |
| American Academy of Family Physicians (2013) <sup>32</sup>                    | Les données actuelles sont insuffisantes pour recommander ou déconseiller l'utilisation de la TDM à faible dose comme examen de dépistage du cancer du poumon.                                                                                                                                                                                                                                                                                                                                                                                                                                                                               |

Note : TDM = tomodensitométrie.

En supposant le dépistage réalisé conformément à la ligne directrice en vigueur et un taux de participation au dépistage de 100 % pour les patients répondant aux critères d'admissibilité du *National Lung Screening Trial* (et de 95 % à la reprise, comme recommandé), le coût différentiel pour le système serait de 2,3 milliards de dollars pour les années 2014 à 2034. Si l'on ne tient pas compte des coûts indirects, qui ne sont pas intégrés dans le modèle, la différence de rapport coût-efficacité comparativement à l'absence de dépistage serait de 74 000 \$ par année de vie pondérée en fonction de la qualité gagnée<sup>23</sup>, ce qui porte à croire que le dépistage par TDM à faible dose serait une dépense raisonnable (à condition qu'elle soit réalisée dans des centres possédant l'expertise nécessaire).

Plusieurs facteurs influent sur ces estimations, notamment les hypothèses utilisées pour estimer les taux de participation au dépistage et à la reprise du dépistage. Or, selon les seuils habituels, l'offre de dépistage demeure financièrement intéressante pour les taux de participation à la reprise plausibles<sup>25</sup>. De plus, le recours à la TDM à faible dose semble plus économique lorsqu'associé à un program d'abandon du tabagisme<sup>23</sup>.

## Autres lignes directrices

Généralement, ces nouvelles recommandations cadrent avec les autres lignes directrices d'organisations canadiennes et internationales sur le dépistage du cancer du poumon (tableau 1)<sup>4,5,26-32</sup>. Toutefois, le Groupe d'étude canadien reste prudent et recommande un examen annuel pendant 3 ans plutôt que des examens tous les ans ou aux 2 ans en continu.

## Lacunes dans l'état des connaissances

Il existe peu de données concernant la durée (p. ex., dépistage prolongé après 3 ans d'examen annuel) et la fréquence (p. ex., examens tous les ans ou tous les 2 ans) optimales du dépistage du cancer du poumon, sans compter que le seuil utilisé pour qualifier un résultat positif varie d'une étude à l'autre. Il faudra donc mener d'autres études pour trouver les meilleures pratiques diagnostiques et méthodes de prise en charge des nodules pulmonaires. D'ici à ce qu'on dispose de données probantes sur le sujet, il serait préférable de suivre le protocole utilisé dans le *National Lung Screening Trial*<sup>6</sup>.

Il faudra aussi faire des recherches pour déterminer si des outils d'évaluation du risque peuvent être intégrés dans l'algorithme clinique et quels effets leur intégration entraîne sur les issues cliniques importantes pour le patient. On ne sait toujours pas si le dépistage par TDM à faible dose serait profitable pour les adultes présentant des facteurs de risque de cancer du poumon autres que le tabagisme (comme l'exposition au radon, à la fumée secondaire et à d'autres substances toxiques, à des expositions professionnelles, à une histoire familiale ou à une radiothérapie thoracique) ou ayant des antécédents de tabagisme n'atteignant pas les seuils visés par les recommandations. Les prochaines études devraient en priorité déterminer les populations qui ne peuvent pas profiter du dépistage en raison de leurs comorbidités.

## Conclusion

Le Groupe d'étude canadien recommande d'effectuer un dépistage annuel du cancer du poumon par TDM à faible dose pendant 3 années consécutives chez les adultes de 55 à 74 ans ayant des antécédents de tabagisme d'au moins 30 paquets-années qui fument ou qui ont cessé de fumer au cours des 15 dernières années. Il recommande aussi de ne pas effectuer de dépistage systématique du cancer du poumon par TDM à faible dose chez tous les autres adultes, quels que soient leurs antécédents de tabagisme, leur âge ou les autres facteurs de risque. Enfin, il recommande de ne pas effectuer de dépistage du cancer du poumon par radiographie pulmonaire (avec ou sans cytologie des expectorations).

## Références

1. Canadian Cancer Society's Advisory Committee on Cancer Statistics. Canadian Cancer Statistics 2015. Toronto: Canadian Cancer Society; 2015.
2. Canadian Tobacco Use Monitoring Survey (CTUMS) 2012. Ottawa: Health Canada; 2012. Accessible ici : [www.hc-sc.gc.ca/hc-ps/tobac-tabac/research-recherche/stat/ctums-esutc\\_2012-eng.php](http://www.hc-sc.gc.ca/hc-ps/tobac-tabac/research-recherche/stat/ctums-esutc_2012-eng.php) (consulté le 22 janvier 2014).
3. Non-small cell lung cancer survival rates by stage. Atlanta: American Cancer Society; 2015. Accessible ici : [www.cancer.org/cancer/lungcancer-non-smallcell/detailedguide/non-small-cell-lung-cancer-survival-rates](http://www.cancer.org/cancer/lungcancer-non-smallcell/detailedguide/non-small-cell-lung-cancer-survival-rates) (consulté le 20 mai 2015).
4. US Preventive Services Task Force. Lung cancer screening: recommendation statement. *Ann Intern Med* 2004;140:738-9.
5. Palda VA, Van Spall HGC. Screening for lung cancer: updated recommendations from the Canadian Task Force on Preventive Health Care. Calgary: Canadian Task Force on Preventive Health Care; 2003. Accessible ici : [canadiantaskforce.ca/files/guidelines/2003-lung-cancer-updated-recommendations-en.pdf](http://canadiantaskforce.ca/files/guidelines/2003-lung-cancer-updated-recommendations-en.pdf) (consulté le 29 janvier 2016).
6. Aberle DR, Adams AM, Berg CD, National Lung Screening Trial Research Team; et al. Reduced lung-cancer mortality with low-dose computed tomographic screening. *N Engl J Med* 2011;365:395-409.
7. Lopes Pegna A, Picozzi G, Mascalchi M, et al. Design, recruitment and baseline results of the ITALUNG trial for lung cancer screening with low-dose CT. *Lung Cancer* 2009;64:34-40.
8. van Iersel CA, de Koning HJ, Draisma G, et al. Risk-based selection from the general population in a screening trial: selection criteria, recruitment and power for the Dutch-Belgian randomised lung cancer multi-slice CT screening trial (NELSON). *Int J Cancer* 2007;120:868-74.
9. Saghir Z, Dirksen A, Ashraf H, et al. CT screening for lung cancer brings forward early disease. The randomised Danish Lung Cancer Screening Trial: status after five annual screening rounds with low-dose CT. *Thorax* 2012;67:296-301.
10. Becker N, Motsch E, Gross ML, et al. Randomized study on early detection of lung cancer with MSCT in Germany: study design and results of the first screening round. *J Cancer Res Clin Oncol* 2012;138:1475-86.
11. Canadian Task Force on Preventive Health Care procedure manual. Calgary: Canadian Task Force on Preventive Health Care; 2014. Accessible ici : [canadiantaskforce.ca/files/procedural-manual-en.pdf](http://canadiantaskforce.ca/files/procedural-manual-en.pdf) (consulté le 29 janvier 2016).
12. Peirson L, Ali MU, Warren R, et al. Screening for lung cancer: systematic review and meta-analyses. Hamilton (ON): McMaster Evidence Review and Synthesis Centre; 2015. Accessible ici : [canadiantaskforce.ca/ctfphc-guidelines/2015-lung-cancer/systematic-review](http://canadiantaskforce.ca/ctfphc-guidelines/2015-lung-cancer/systematic-review) (consulté le 25 février 2016).
13. Schünemann H, Brozek J, Guyatt G, et al., editors. GRADE handbook. The GRADE Working Group; 2009. Accessible ici : [gdt.guidelinedevelopment.org/central\\_prod/\\_design/client/handbook/handbook.html#h.l7zdc2r2pkyf](http://gdt.guidelinedevelopment.org/central_prod/_design/client/handbook/handbook.html#h.l7zdc2r2pkyf) (consulté le 29 janvier 2016).
14. Manser R, Lethaby A, Irving LB, et al. Screening for lung cancer. *Cochrane Database Syst Rev* 2013;(6):CD001991.
15. Becker N, Motsch E, Gross ML, et al. Randomized study on early detection of lung cancer with MSCT in Germany: results of the first 3 years of follow-up after randomization. *J Thorac Oncol* 2015;10:890-6.
16. Black WC, Keeler EB, Soneji SS, et al. Cost-effectiveness of CT screening in the National Lung Screening Trial. *N Engl J Med* 2015;372:388.

17. Gohagan J, Marcus P, Fagerstrom R, et al. Baseline findings of a randomized feasibility trial of lung cancer screening with spiral CT scan vs chest radiograph: the Lung Screening Study of the National Cancer Institute. *Chest* 2004;126:114-21.
18. Marcus PM, Prorok PC, Miller AB, et al. Conceptualizing overdiagnosis in cancer screening. *J Natl Cancer Inst* 2015;107:djv014.
19. Wao H, Mhaskar R, Kumar A, et al. Survival of patients with non-small cell lung cancer without treatment: a systematic review and meta-analysis. *Syst Rev* 2013;2:10.
20. Bashir N, Mascarenhas A, Moore J, et al. Patient preferences for Lung Cancer Screening Guideline recommendations. Toronto: La Ka Shing Institute, St. Michael's Hospital; 2015. Accessible ici : [canadiantaskforce.ca/files/ctfphcpatient\\_preferenceslungcancerreport150706final.pdf](http://canadiantaskforce.ca/files/ctfphcpatient_preferenceslungcancerreport150706final.pdf) (consulté le 25 février 2016).
21. Canadian Best Practices Portal: interventions. Ottawa: Public Health Agency of Canada; 2015. Accessible ici : [cbpp-pcpe.phac-aspc.gc.ca/interventions/](http://cbpp-pcpe.phac-aspc.gc.ca/interventions/) (consulté le 9 octobre 2015).
22. Lung cancer screening framework can help maximize benefits, reduce risks. Toronto: Canadian Partnership Against Cancer; 2015. Accessible ici : [www.partnershipagainstcancer.ca/lung-cancer-screening-framework-can-help-maximize-benefits-reduce-risks/](http://www.partnershipagainstcancer.ca/lung-cancer-screening-framework-can-help-maximize-benefits-reduce-risks/) (consulté le 9 octobre 2015).
23. Goffin JR, Flanagan WM, Miller AB, et al. Cost-effectiveness of lung cancer screening in Canada. *JAMA Oncol* 2015;1:807-13.
24. Sadatsafavi M, Zafari Z, Mitton C, et al. Evaluating the Cancer Risk Management Model (CRMM) — Lung Cancer Module. Vancouver: Centre for Clinical Epidemiology and Evaluation, Vancouver Coastal Health Research Institute; 2015. Accessible ici : [canadiantaskforce.ca/files/ubc-eval-crmm-lc-final.pdf](http://canadiantaskforce.ca/files/ubc-eval-crmm-lc-final.pdf) (consulté le 25 février 2016).
25. Clement FM, Harris A, Li JJ, et al. Using effectiveness and costeffectiveness to make drug coverage decisions: a comparison of Britain, Australia, and Canada. *JAMA* 2009;302:1437-43.
26. Roberts H, Walker-Dilks C, Sivjee K, et al. Screening high-risk populations for lung cancer. Toronto: Cancer Care Ontario; 2013.
27. *Lung cancer*. Atlanta (GA): American Cancer Society; 2014. Accessible ici : [www.cancer.org/cancer/lungcancer/index](http://www.cancer.org/cancer/lungcancer/index) (consulté le 2 avril 2014).
28. Alberts WM; American College of Chest Physicians. Introduction: diagnosis and management of lung cancer: ACCP evidence-based clinical practice guidelines. *Chest* 2007;132(Suppl):20S-2S.
29. Providing guidance on lung cancer screening to patients and physicians. Washington: American Lung Association; 2012. Accessible ici : [www.lung.org/assets/documents/lung-cancer/lung-cancer-screening-report.pdf](http://www.lung.org/assets/documents/lung-cancer/lung-cancer-screening-report.pdf) (consulté le 13 septembre 2013).
30. Jaklitsch MT, Jacobson FL, Austin JH, et al. The American Association for Thoracic Surgery guidelines for lung cancer screening using low-dose computed tomography scans for lung cancer survivors and other high-risk groups. *J Thorac Cardiovasc Surg* 2012;144:33-8.
31. NCCN Guidelines for Patients. Lung cancer screening. Fort Washington (PA): National Comprehensive Cancer Network (NCCN); 2014. Accessible ici : [www.nccn.org/patients/guidelines/lung\\_screening/index.html](http://www.nccn.org/patients/guidelines/lung_screening/index.html) (consulté le 22 septembre 2013).
32. Clinical preventive service recommendation: lung cancer. Leawood (KS): American Academy of Family Physicians; 2013. Accessible ici : [www.aafp.org/patient-care/clinical-recommendations/all/lung-cancer.html](http://www.aafp.org/patient-care/clinical-recommendations/all/lung-cancer.html) (consulté le 22 mai 2015).

**Intérêts concurrents :** aucun déclaré.

Cet article a été révisé par des pairs.

**Équipe de rédaction de la ligne directrice :** Gabriela Lewin, Kate Morissette, James Dickinson, Neil Bell, Maria Bacchus, Harminder Singh, Marcello Tonelli et Alejandra Jaramillo Garcia.

**Affiliations :** Département de médecine familiale de l'Université d'Ottawa (Lewin); Agence de la santé publique du Canada (Morissette, Jaramillo Garcia), Ottawa, Ont.; Département de médecine familiale de l'Université de l'Alberta (Bell), Edmonton, Alta.; Département de médecine interne et département des sciences de la santé communautaire de l'Université du Manitoba (Singh), Winnipeg, Man.; Département de médecine familiale et département des sciences de la santé communautaire (Dickinson), département de médecine (Bacchus) et bureau de la doyenne associée à la recherche (Tonelli) de l'Université de Calgary, Calgary, Alta.

**Contributeurs :** Gabriela Lewin, James Dickinson, Neil Bell, Maria Bacchus, Harminder Singh, Alejandra Jaramillo Garcia et Marcello Tonelli ont joué un rôle majeur dans la conception et la planification de l'étude, ont contribué à l'interprétation des données et ont révisé le manuscrit original. Kate Morissette a participé à l'analyse et à l'interprétation des données, et a rédigé la première version du manuscrit. Tous les auteurs ont approuvé la version finale pour publication et se portent garants du travail.

**Financement :** Le financement du Groupe d'étude canadien sur les soins de santé préventifs est fourni par l'Agence de la santé publique du Canada. La création du Modèle de gestion des risques de cancer a été rendue possible grâce à une contribution financière de Santé Canada, reçue par l'intermédiaire du Partenariat canadien contre le cancer. Les opinions des organismes subventionnaires n'ont aucunement influé sur le contenu de la ligne directrice; les intérêts concurrents ont été notés et pris en compte. Les opinions exprimées n'engagent que les auteurs et ne représentent pas nécessairement celles de l'Agence de la santé publique du Canada.

**Remerciements :** Les auteurs remercient les membres de l'équipe de recherche du Centre d'analyse et de synthèse des données de l'Université McMaster (Leslea Peirson, Muhammad Usman Ali, Donna Fitzpatrick-Lewis, Parminder Raina, Diana Scherifali et Meghan Kenny) qui ont effectué la revue systématique sur laquelle reposent les recommandations; le personnel de la Division des lignes directrices en prévention de l'Agence de la santé publique du Canada; l'équipe du Centre d'épidémiologie et d'évaluation cliniques de l'Université de la Colombie-Britannique qui a évalué le module du cancer du poumon du Modèle de gestion des risques de cancer (Mohsen Sadat Safavi, Zafar Zafari, Craig Mitton and Sirling Bryan); ainsi que les réviseurs, qui, par leurs commentaires, ont aidé les auteurs à améliorer le manuscrit (Melissa Brouwers, Université McMaster et Institut de recherche sur le cancer Escarpment; Heather Bryant, Partenariat canadien contre le cancer et Université de Calgary; Jennifer Crosswell, Agency for Healthcare Research and Quality; Conrad B. Falkson, Université Queen's et Centre de cancérologie du Sud-Est de l'Ontario; Tunji Fatoye, Université du Manitoba et Action cancer Manitoba; John R. Goffin, Université McMaster; Christopher A. Hergott, Université de Calgary; Michael R. Johnston, Institut de recherche sur le cancer Beatrice Hunter, Institut de recherche Terry Fox et Université Dalhousie; Alan Kaplan, Collège des médecins de famille du Canada; John C. Kirk, Université McGill; Mark Kristjanson, Université du Manitoba et Action cancer Manitoba; Stephen Lam, Université de la Colombie-Britannique et Agence du cancer de la Colombie-Britannique; Suzanne Levitz, Collège des médecins de famille du Canada; Paul MacEachern, Université de Calgary; Robert Nuttall, Société canadienne du cancer; et Gilles Plourde, Santé Canada).

**Correspondence to :** Groupe d'étude canadien sur les soins de santé préventifs, [info@groupeetudecanadien.ca](mailto:info@groupeetudecanadien.ca)
